# Supplementary material
Source: Springer Nature journal article supplement (https://www.springermedizin.de/resource/supplementary/13054_2013_2177_MOESM3_ESM.pdf/9712610)

# FIRST AKI

# HIGHEST AKI

**Stage 1**  
111 patients  
(26.2%)

**Stage 2**  
22 patients  
(5.2%)

**Stage 3**  
20 patients  
(4.7%)

**Stage 1**  
71 patients (64.0%)

**Stage 2**  
24 patients (21.6%)

**Stage 3**  
16 patients (14.4%)

**Stage 2**  
11 patients (50.0%)

**Stage 3**  
11 patients (50.0%)

**Stage 3**  
20 patients  
(100%)

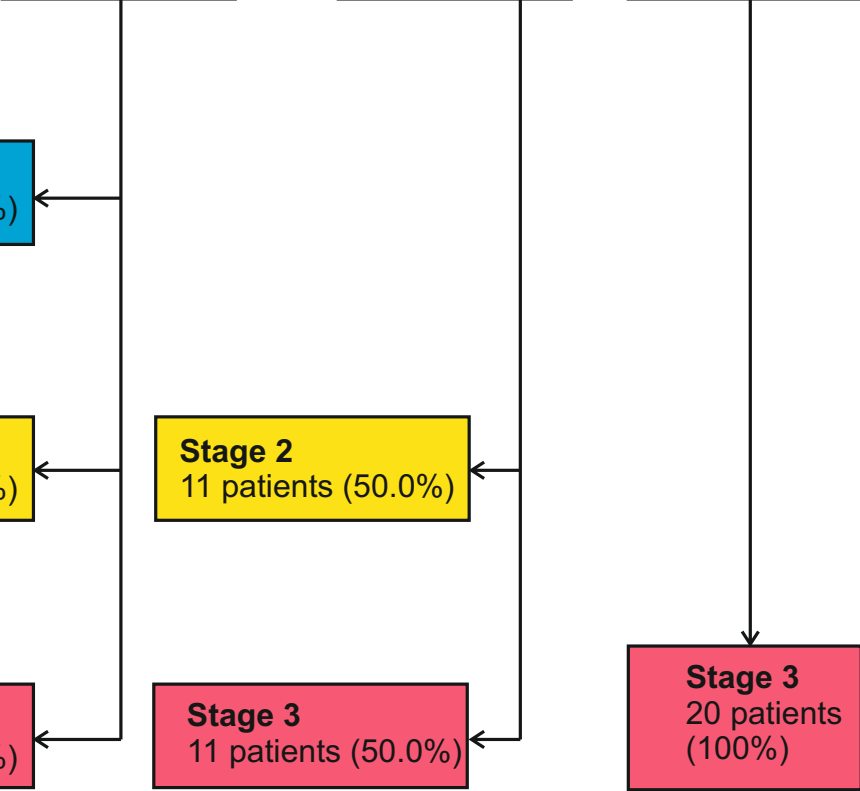

Supplement: MOESM3 [file 9712610]
